# Supplementary material for: Nonvolatile electro-mechanical coupling in two-dimensional lattices
Source: Royal Society of Chemistry journal article supplement (doi:10.1039/d2nh00509c), 2023-01-01
Supplement: d2nh00509c1.pdf [file d2nh00509c1.pdf]

## Supporting Information for

### Nonvolatile Electro-Mechanical Coupling in Two-Dimensional Lattices

Xilong Xu, Ting Zhang, Ying Dai, \* Baibiao Huang, Yandong Ma\*

School of Physics, State Key Laboratory of Crystal Materials, Shandong University, Shandan  
Street 27, Jinan 250100, China

E-mail: daiy60@sina.com; yandong.ma@sdu.edu.cn

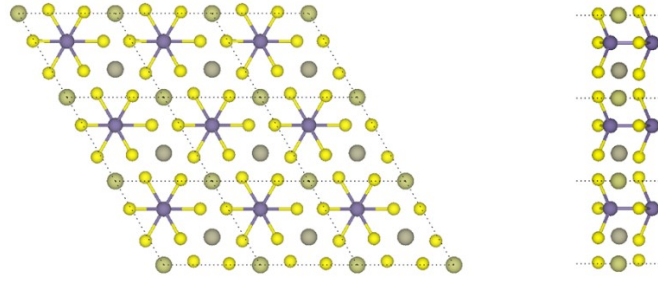

**Fig. S1** Crystal structure of SL ReIrGe<sub>2</sub>S<sub>6</sub> from top and side views.

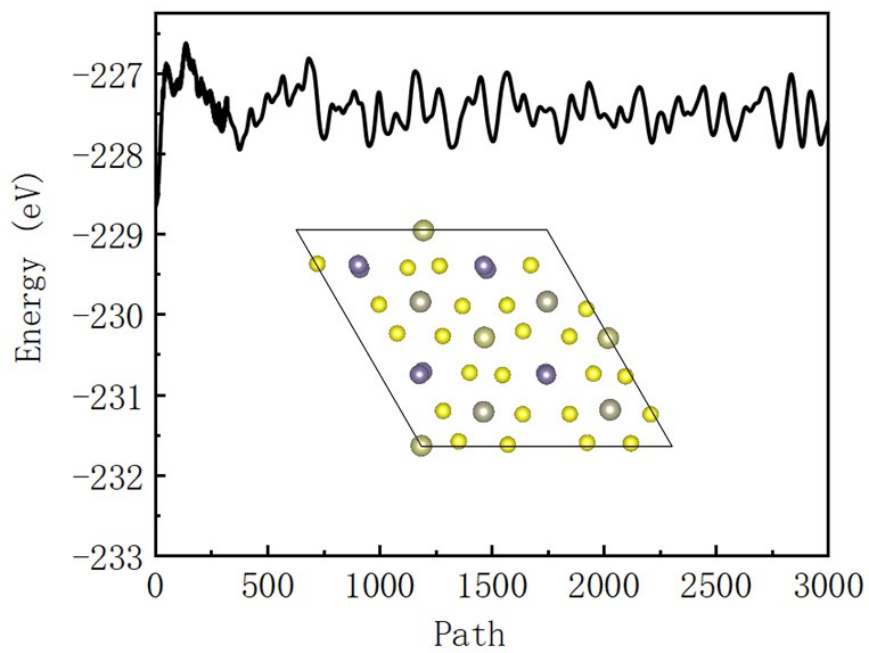

**Fig. S2** Variation of total energy during AIMD (300 K, 3 ps) simulations. Inset is crystal structure of SL ReIrGe<sub>2</sub>S<sub>6</sub> taken from the end of AIMD.

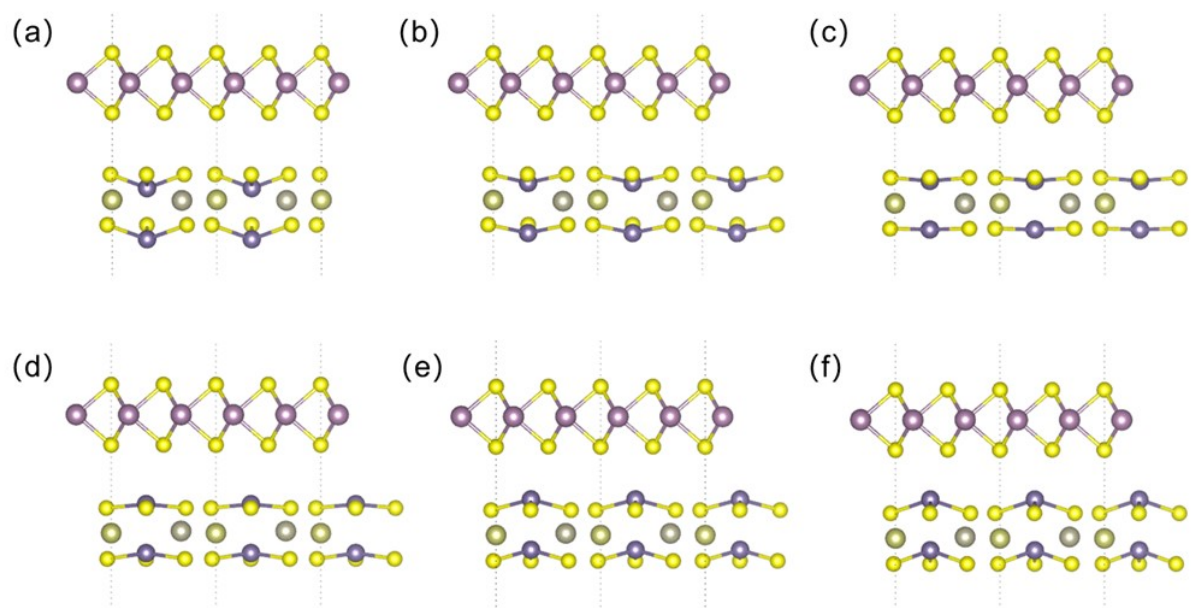

**Fig. S3** Structure generation during CI-NEB for bilayer MoS<sub>2</sub>/ReIrGe<sub>2</sub>S<sub>6</sub>. Yellow, blue, gray, brown, and purple spheres represent S, Ge, Re, Ir, and Mo atoms, respectively.

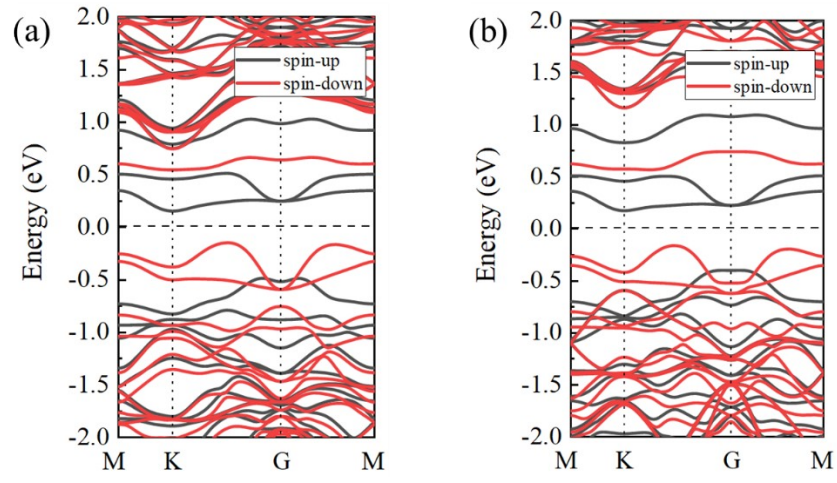

**Fig. S4** (a-b) Band structures of MoS<sub>2</sub>/ReIrGe<sub>2</sub>S<sub>6</sub> bilayer with P<sub>↑</sub> and P<sub>↓</sub>.

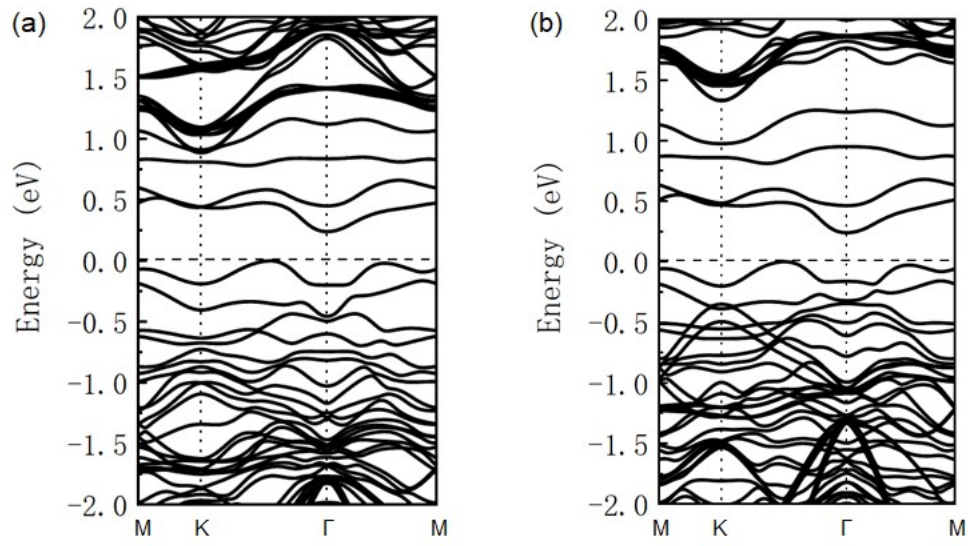

**Fig. S5** (a-b) Band structures with SOC of MoS<sub>2</sub>/ReIrGe<sub>2</sub>S<sub>6</sub> bilayer with P $\uparrow$  and P $\downarrow$ .

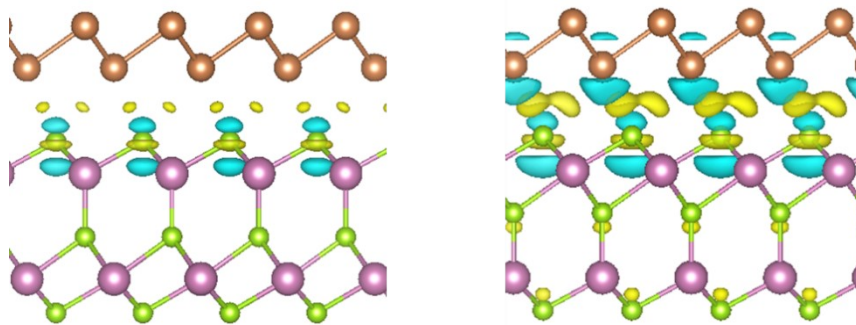

**Fig. S6** The charge density difference of Sb/In<sub>2</sub>Se<sub>3</sub> bilayer under P $\uparrow$  and P $\downarrow$ . The isosurface value is set to 0.02 electrons per  $\text{\AA}^3$ .

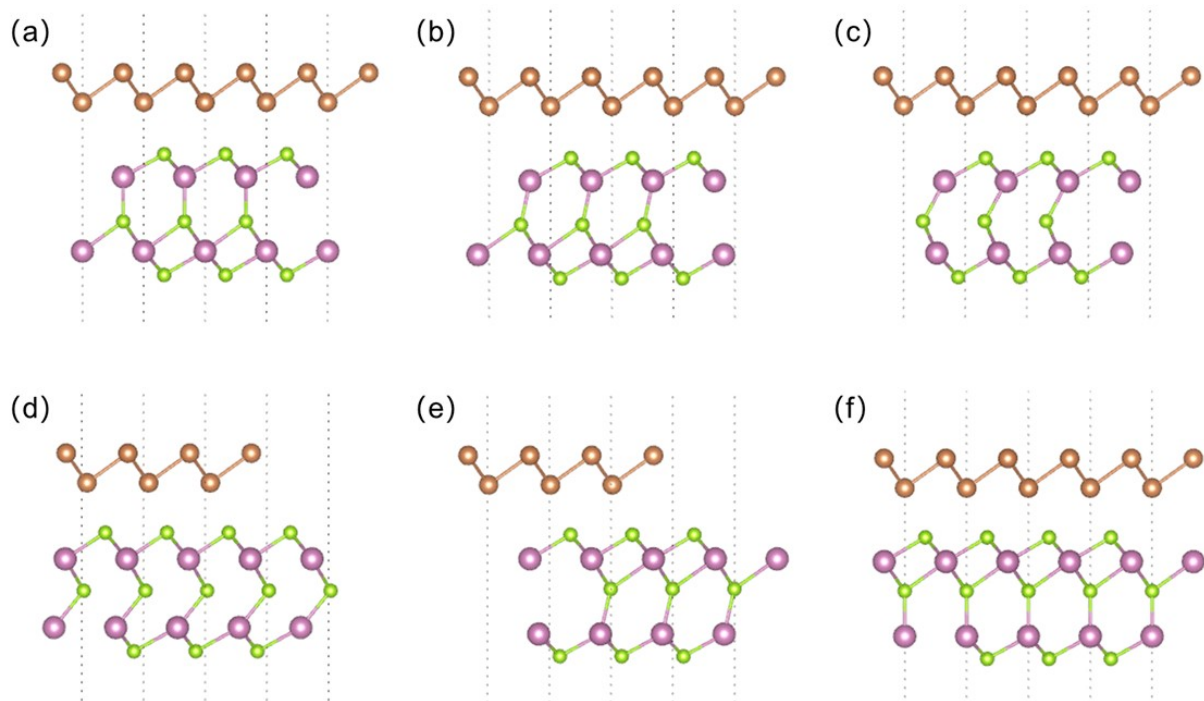

**Fig. S7** Structure generation during CI-NEB for bilayer Sb/In<sub>2</sub>Se<sub>3</sub>. Brown, green, and purple spheres represent Sb, Se, and In atoms, respectively.



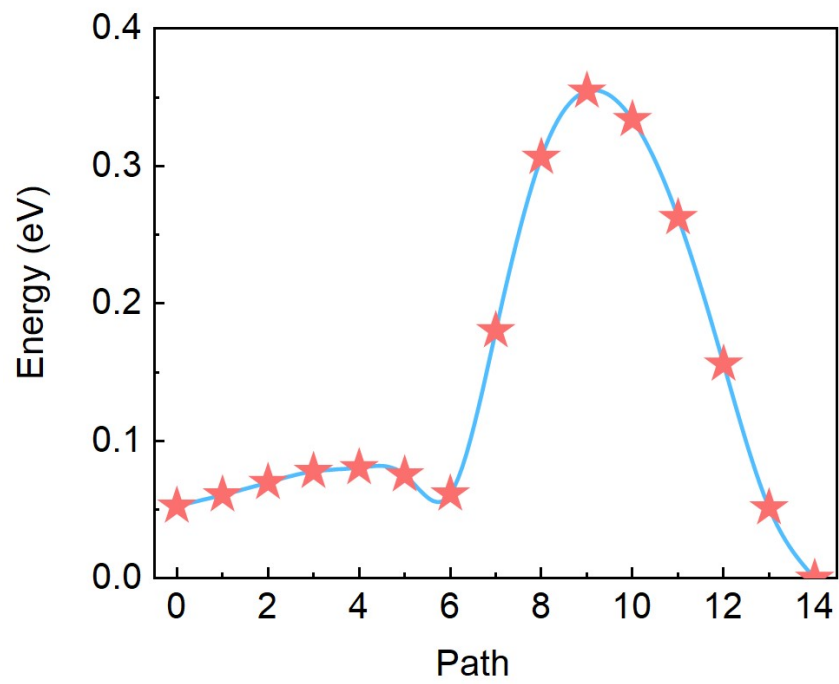

**Fig. S8** Minimum energy pathway of FE switching as a function of step number within NEB for Sb/In<sub>2</sub>Se<sub>3</sub> bilayer.

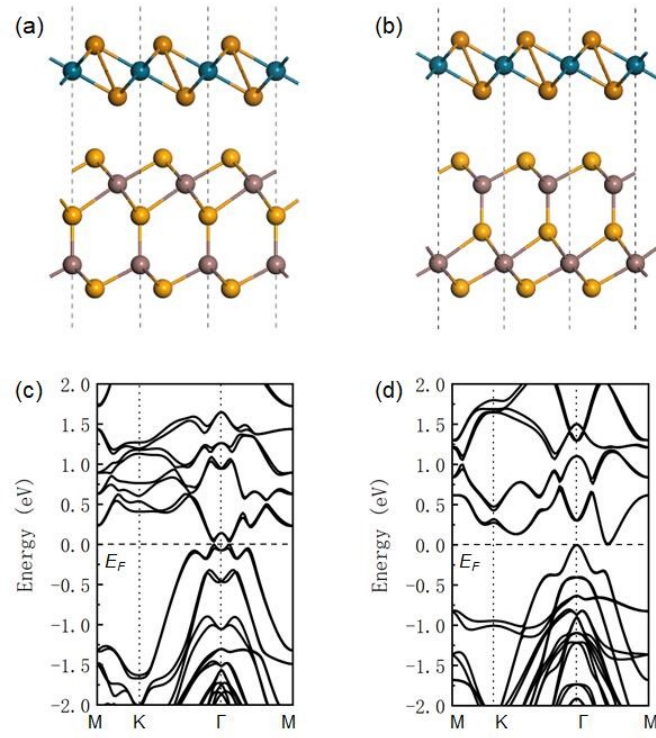

**Fig. S9** (a-b) Crystal structures of PdTe<sub>2</sub>/In<sub>2</sub>Se<sub>3</sub> bilayer under P<sub>↑</sub> and P<sub>↓</sub> configurations. Orange, blue, yellow and brown spheres represent Te, Pd, Se and In atoms, respectively. (c-d) Band structures of PdTe<sub>2</sub>/In<sub>2</sub>Se<sub>3</sub> bilayer under P<sub>↑</sub> and P<sub>↓</sub> configurations.

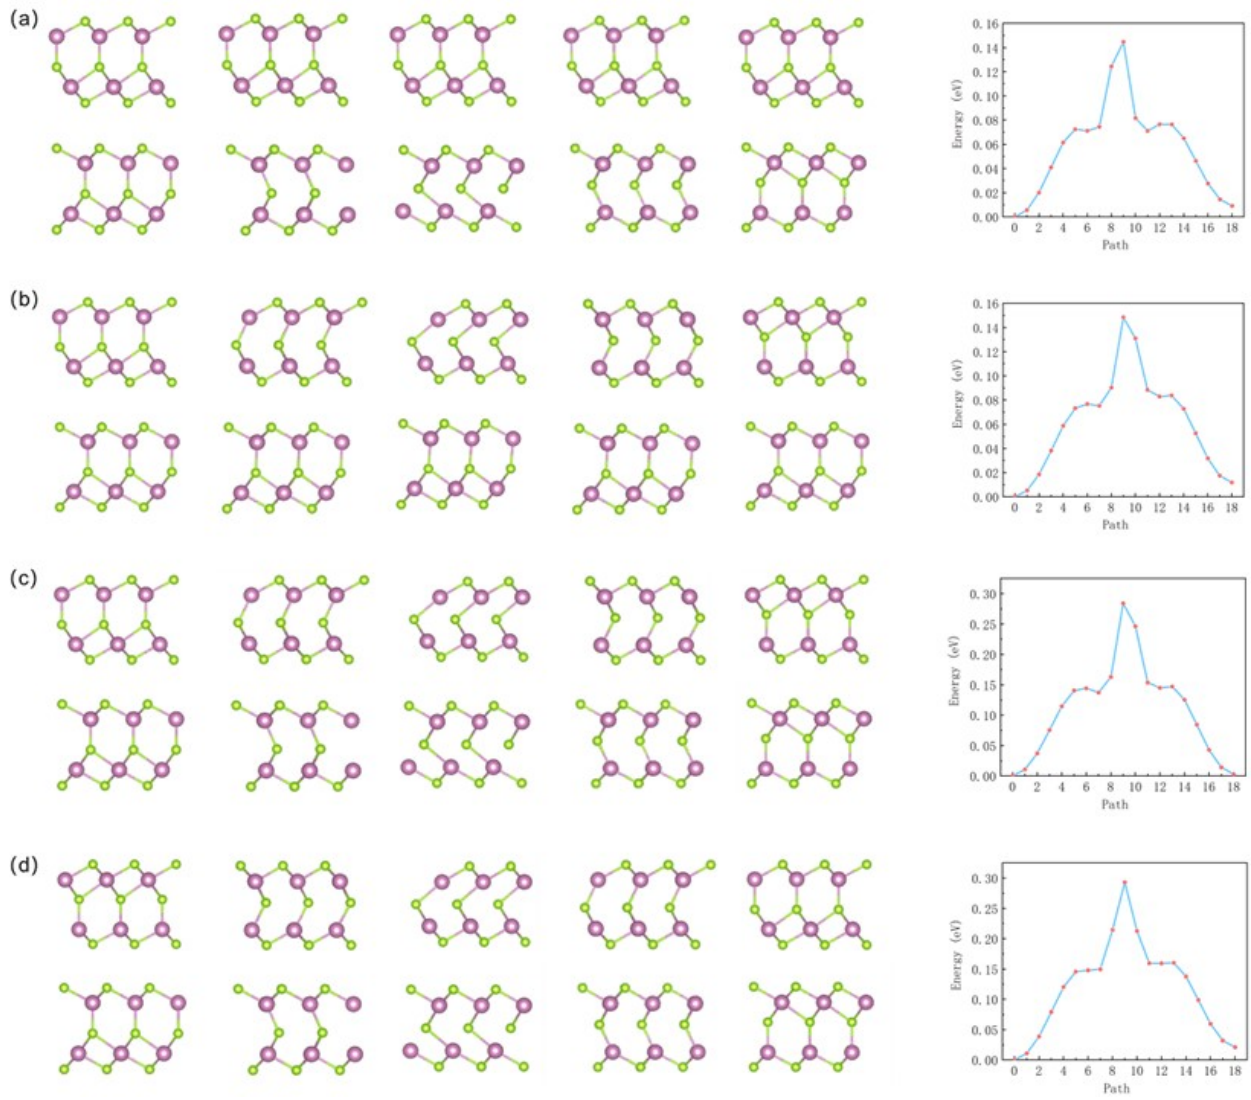

**Fig. S10** Structure generation and Minimum energy pathway of FE switching for bilayer  $\text{In}_2\text{Se}_3$ . (a) From  $P\uparrow\uparrow$  to  $P\uparrow\downarrow$ . (b) From  $P\uparrow\uparrow$  to  $P\downarrow\uparrow$ . (c) From  $P\uparrow\uparrow$  to  $P\downarrow\downarrow$ . (d) From  $P\downarrow\uparrow$  to  $P\uparrow\downarrow$ . Green, and purple spheres represent Sb, Se, and In atoms, respectively.

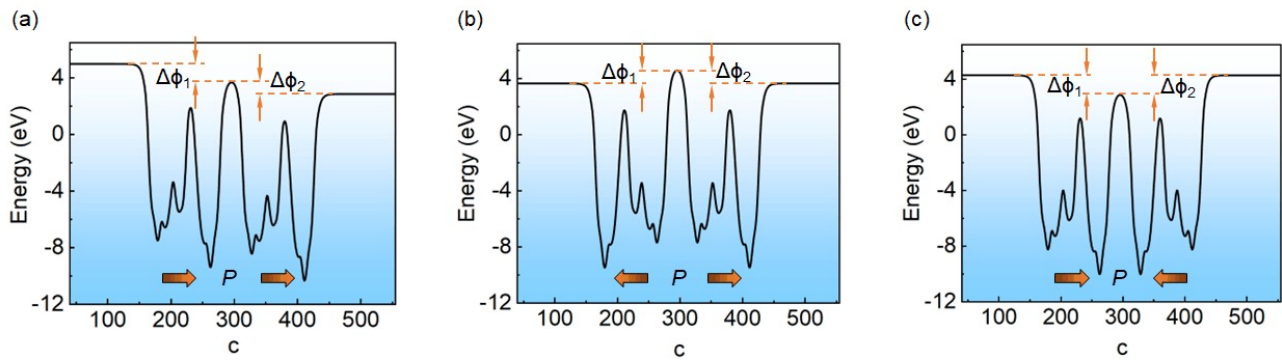

**Fig. S11** Plane-averaged potential of bilayer  $\text{In}_2\text{Se}_3$  along  $z$  direction under (a)  $P\uparrow\uparrow$ , (b)  $P\uparrow\downarrow$  and (c)  $P\downarrow\uparrow$  configurations.
